# Supplementary material for: Sulfidation of nickel foam with enhanced electrocatalytic oxidation of 5-hydroxymethylfurfural to 2,5-furandicarboxylic acid
Source: Royal Society of Chemistry journal article supplement (doi:10.1039/d1dt02025k), 2021-01-01
Supplement: d1dt02025k1.pdf [file d1dt02025k1.pdf]

## Sulfidation of nickel foam with enhanced electrocatalytic oxidation of 5-Hydroxymethylfurfural to 2,5-Furandicarboxylic Acid

Wei Wang,<sup>1</sup> Fanhao Kong<sup>1</sup>, Zhe Zhang,<sup>1\*</sup> Lan Yang<sup>1</sup>, Min Wang,<sup>1\*</sup>

### Affiliations:

<sup>1</sup> Zhang Dayu School of Chemistry, Dalian University of Technology, Dalian 116024, Liaoning, China.

\*Correspondence to: wangmin@dlut.edu.cn, zhzh@dlut.edu.cn

### Supplementary Results

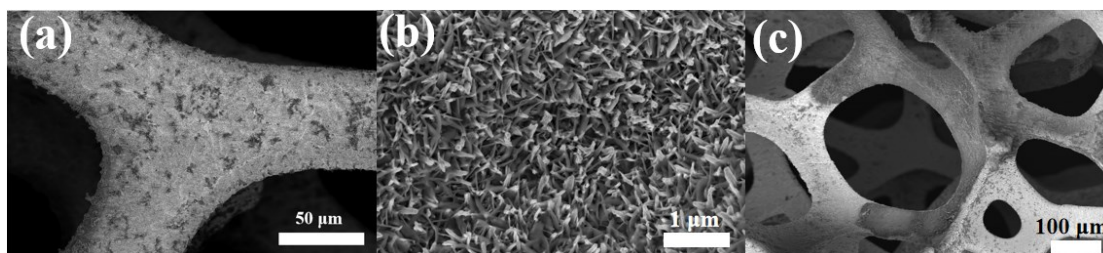

Figure S1. SEM images of Ni<sub>3</sub>S<sub>2</sub>/NF.

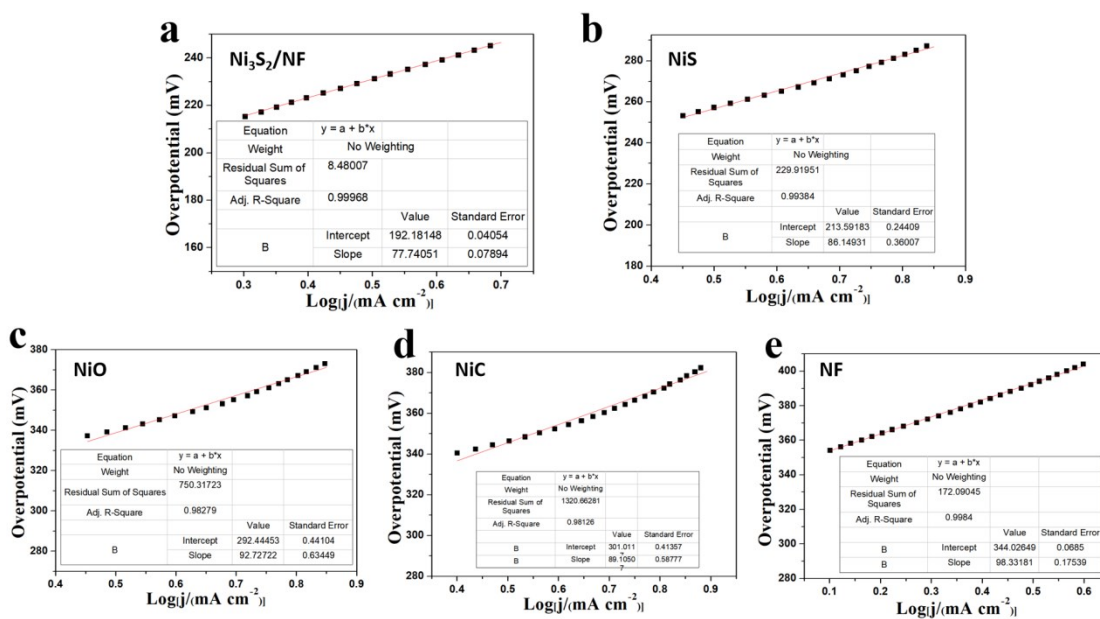

Figure S2. Tafel plot of Ni<sub>3</sub>S<sub>2</sub>/NF, NF, NiC, NiO and NiS in 10 mM HMF solution with different sweep speeds.

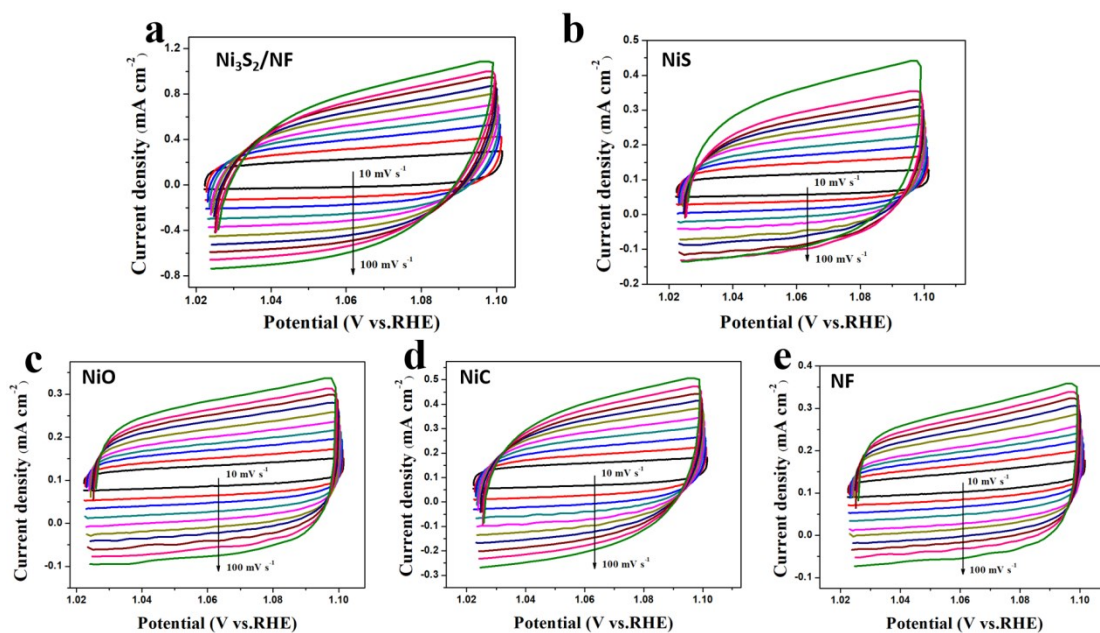

**Figure S3.** Cyclic voltammograms of  $\text{Ni}_3\text{S}_2/\text{NF}$ ,  $\text{NF}$ ,  $\text{NiC}$ ,  $\text{NiO}$  and  $\text{NiS}$  in 10 mM HMF solution with different sweep speeds.

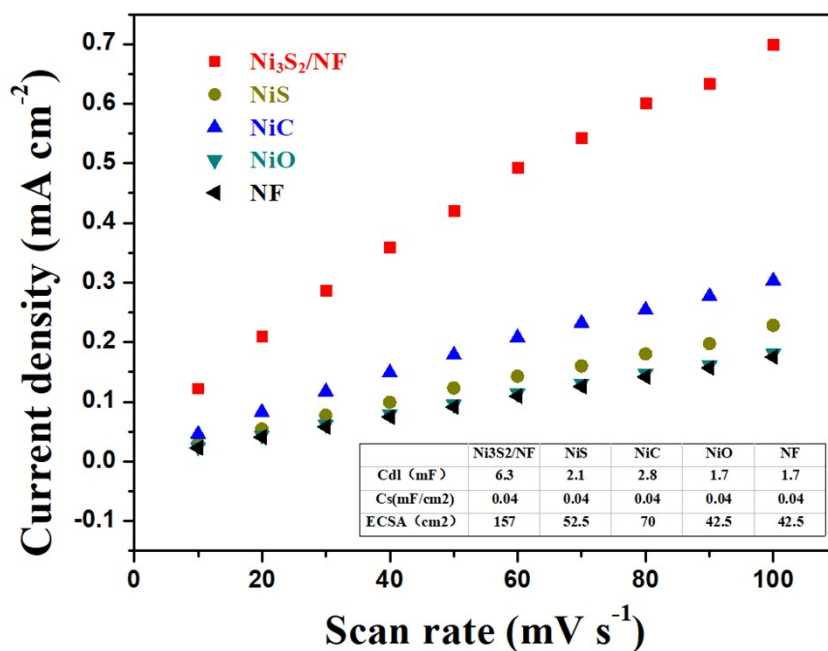

**Figure S4.** Schematic diagram of the charge current density difference and scan rate of  $\text{Ni}_3\text{S}_2/\text{NF}$ ,  $\text{NF}$ ,  $\text{NiC}$ ,  $\text{NiO}$  and  $\text{NiS}$ .

| Sample: HMF      |                    | Mobile phase: 5mM Ammonium Formate (70%) +Methanol (30%) |                 |
|------------------|--------------------|----------------------------------------------------------|-----------------|
| Sample size (ul) | Concentration (mM) | Peak area                                                | Peak time (min) |
| 4                | 0.0267             | 303091                                                   | 7.759           |
| 8                | 0.0533             | 584847                                                   | 7.961           |
| 12               | 0.08               | 859438                                                   | 7.962           |
| 16               | 0.1067             | 1123145                                                  | 7.961           |
| 20               | 0.1333             | 1419352                                                  | 7.963           |

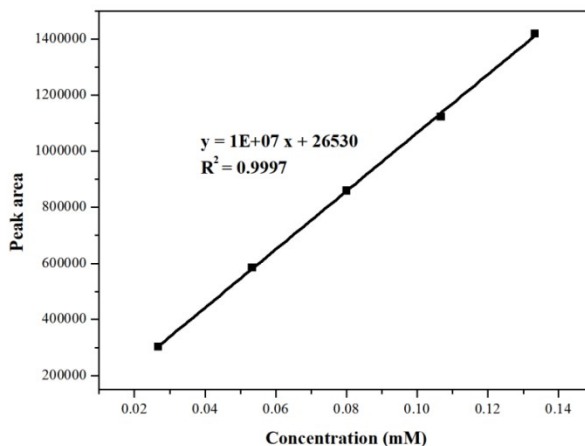

**Figure S5.** HPLC spectra of standard product of HMF.

| Sample: FDCA     |                    | Mobile phase: 5mM Ammonium Formate (70%) +Methanol (30%) |                 |
|------------------|--------------------|----------------------------------------------------------|-----------------|
| Sample size (ul) | Concentration (mM) | Peak area                                                | Peak time (min) |
| 4                | 0.0267             | 501212                                                   | 3.069           |
| 8                | 0.0533             | 987783                                                   | 3.067           |
| 12               | 0.08               | 1590407                                                  | 3.063           |
| 16               | 0.1067             | 2141746                                                  | 3.061           |
| 20               | 0.1333             | 2672621                                                  | 3.599           |

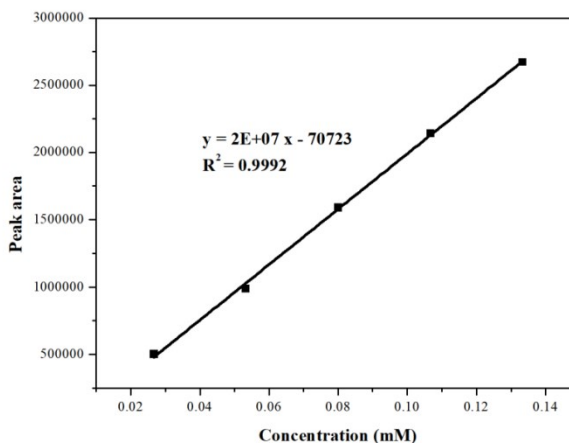

**Figure S6.** HPLC spectra of standard product of FDCA.

| Sample: HMFCA    |                    | Mobile phase: 5mM Ammonium Formate (70%) +Methanol (30%) |                 |
|------------------|--------------------|----------------------------------------------------------|-----------------|
| Sample size (ul) | Concentration (mM) | Peak area                                                | Peak time (min) |
| 4                | 0.0267             | 217371                                                   | 5.417           |
| 8                | 0.0533             | 396997                                                   | 5.406           |
| 12               | 0.08               | 564091                                                   | 5.397           |
| 16               | 0.1067             | 756261                                                   | 5.388           |
| 20               | 0.1333             | 919094                                                   | 5.381           |

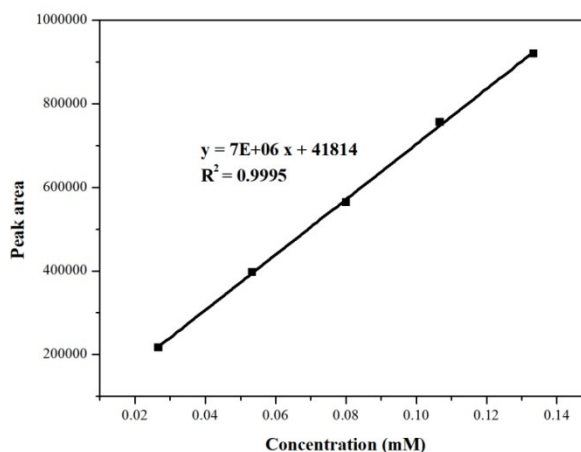

**Figure S7.** HPLC spectra of standard product of HMFCA.

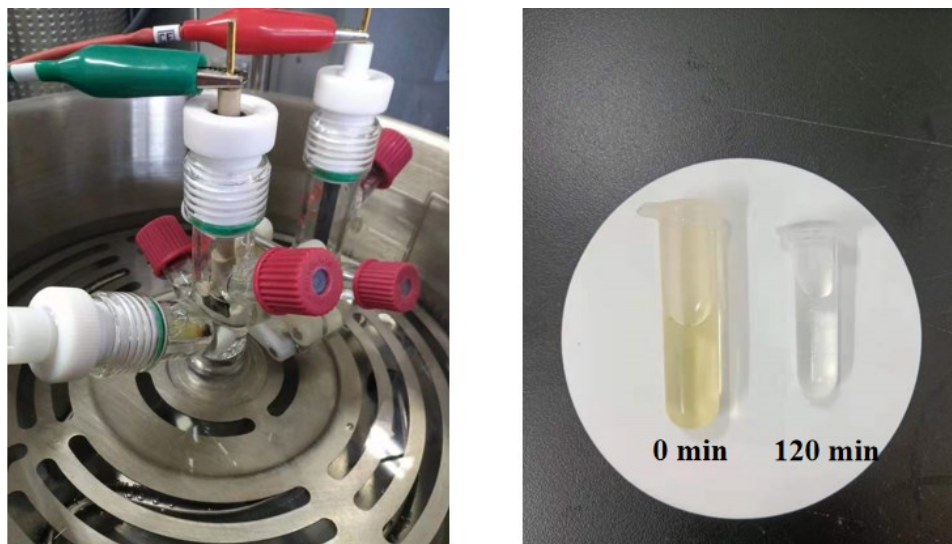

**Figure S8.** Solution color after 120 minutes of catalytic oxidation and color comparison (0 minutes and 120 minutes).

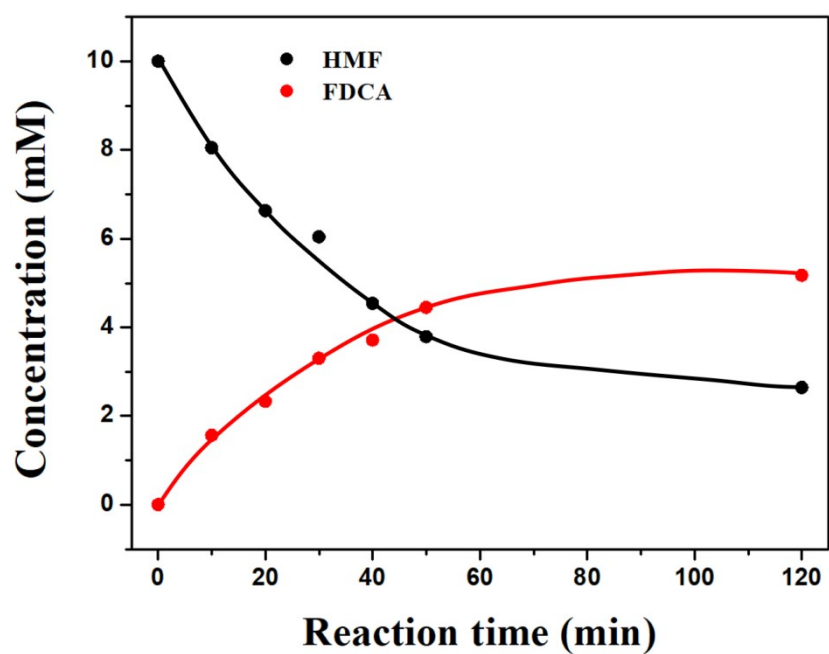

**Figure S9.** The reaction time and concentration changes of HMF and FDCA during the electrochemical oxidation of NF.
